# Supplementary material for: A Screening Study Identified Decitabine as an Inhibitor of Equid Herpesvirus 4 That Enhances the Innate Antiviral Response
Source: MDPI journal article supplement (doi:10.3390/v16050746), 2024-05-08
Supplement: s1 [file s1]

**Supplementary Table S1:** Library of selected compounds for the screening and dose-response assay of antiviral effect by real-time cellular analysis against EHV-4 *in vitro*. N.K.: Not Know

| Compound name                      | Supplier                 | Catalogue no.    | Application                       | Stock solution in DMSO (mM) |
|------------------------------------|--------------------------|------------------|-----------------------------------|-----------------------------|
| 2'-C-methylcytidine                | Ark Phar, Inc.           | AK-88474         | Screening                         | 10                          |
| 25-hydroxycholesterol              | Cayman Europe            | 11097            | Screening                         | 10                          |
| Abacavir sulfate                   | TargetMol                | T6367            | Screening                         | 10                          |
| Aciclovir                          | VWR                      | ABCAAB120631-100 | Screening                         | 20                          |
| Adefovir dipivoxil                 | TargetMol                | T1675            | Screening                         | 10                          |
| Aphidicolin                        | Santa Cruz Biotechnology | Sc-201535        | Screening and dose-response assay | 20                          |
| Arbidol (Umifenovir hydrochloride) | TargetMol                | T0104            | Screening                         | 10                          |
| Atorvastatin                       | N.K.                     | N.K.             | Screening                         | 10                          |
| BAY 57-1293                        | MedChem express          | HY-13303/CS-1693 | Screening and dose-response assay | 20                          |
| Brivudine                          | MedChem express          | HY-13578/CS-6292 | Screening                         | 10                          |
| Capecitabine                       | TargetMol                | T1408            | Screening                         | 10                          |
| Cidofovir                          | TargetMol                | T6244            | Screening and dose-response assay | 10                          |
| Cytarabine                         | TargetMol                | T1272            | Screening                         | 10                          |
| Decitabine                         | TargetMol                | T1508            | Screening                         | 10                          |
| Decitabine                         | MedChem express          | HY-A0004         | Dose-response assay               | 20                          |
| Didanosine                         | TargetMol                | T2578            | Screening                         | 10                          |
| DMXAA (Vadimezan)                  | TargetMol                | T6273            | Screening                         | 10                          |
| Dynasore                           | MedChem express          | HY-15304         | Screening                         | 20                          |
| Eflornithin (dfmo)                 | Sigma Aldrich (Merck)    | D193             | Screening                         | 10                          |
| Emtricitabine                      | TargetMol                | T6214            | Screening                         | 10                          |
| Famciclovir                        | TargetMol                | T1646            | Screening                         | 10                          |
| Favipiravir                        | TargetMol                | T6833            | Screening                         | 10                          |
| 5-fluorouracil                     | AK Scientific, Inc.      | C526             | Screening                         | 10                          |

|                              |                            |                |                                      |    |
|------------------------------|----------------------------|----------------|--------------------------------------|----|
| Fluvastatin                  | N.K.                       | N.K.           | Screening                            | 10 |
| Ganciclovir                  | Clinisciences              | A11645-50      | Screening and<br>dose-response assay | 10 |
| Genistein                    | Sigma Aldrich (Merck)      | G6649-5mg      | Screening                            | 20 |
| Idoxuridine                  | MedChem Tronica            | HY-B0307       | Screening and<br>dose-response assay | 20 |
| Lamivudine                   | TargetMol                  | T0682          | Screening                            | 10 |
| Maribavir                    | TargetMol                  | T2162          | Screening                            | 10 |
| 6-mercaptopurine             | TargetMol                  | T0010          | Screening                            | 10 |
| Nelarabine                   | AK Scientific, Inc.        | R077           | Screening                            | 10 |
| Penciclovir                  | TargetMol                  | T1643          | Screening                            | 10 |
| Pravastatin                  | N.K.                       | N.K.           | Screening                            | 10 |
| Proguanil hydrochloride      | BIONET / Key Organics Ltd. | HS-0102        | Screening                            | 10 |
| Simvastatin                  | N.K.                       | N.K.           | Screening                            | 10 |
| Sofosbuvir                   | TargetMol                  | T6676          | Screening                            | 10 |
| Stavudine                    | TargetMol                  | T1404          | Screening                            | 10 |
| Telbivudine                  | TargetMol                  | T1513          | Screening                            | 10 |
| Tenofovir alafenamide        | TargetMol                  | T2409          | Screening                            | 10 |
| 6-thioguanine                | TargetMol                  | T3089          | Screening                            | 10 |
| Valaciclovir hydrochloride   | TargetMol                  | T1087          | Screening                            | 10 |
| Valganciclovir hydrochloride | TargetMol                  | T1533          | Screening                            | 10 |
| Valganciclovir               | MedChem express            | HY-A0032A      | Dose-response assay                  | 20 |
| Vidarabine                   | CliniSciences              | HY-B0277-100mg | Screening and<br>dose-response assay | 10 |
